# Supplementary material for: Ferucarbotran, a carboxydextran-coated superparamagnetic iron oxide nanoparticle, induces endosomal recycling, contributing to cellular and exosomal EGFR overexpression for cancer therapy
Source: Royal Society of Chemistry journal article supplement (doi:10.1039/c5ra18810e), 2015-01-01
Supplement: c5ra18810e1.pdf [file c5ra18810e1.pdf]

## Supplementary information

### **Ferucarbotran, a carboxydextran-coated superparamagnetic iron oxide nanoparticle, induces endosomal recycling contributing to cellular and exosomal EGFR overexpression for cancer therapy**

Tsai-Hua Chung,<sup>a</sup> Jong-Kai Hsiao,<sup>b</sup> Ming Yao,<sup>c</sup> Szu-Chun Hsu,<sup>d</sup> Hon-Man Liu<sup>e</sup> and Dong-Ming Huang<sup>\*a</sup>

---

<sup>a</sup>Institute of Biomedical Engineering and Nanomedicine, National Health Research Institutes, Miaoli County 35053, Taiwan. \*E-mail: dmhuang@nhri.org.tw

<sup>b</sup>Department of Medical Imaging, Taipei Tzu Chi General Hospital, Buddhist Tzu Chi Medical Foundation & School of Medicine, Tzu Chi University, New Taipei City 23142, Taiwan.

<sup>c</sup>Department of Internal Medicine, National Taiwan University Hospital and College of Medicine, National Taiwan University, Taipei 10002, Taiwan.

<sup>d</sup>Department of Laboratory Medicine, National Taiwan University Hospital and College of Medicine, National Taiwan University, Taipei 10002, Taiwan.

<sup>e</sup>Department of Medical Imaging, National Taiwan University Hospital and College of Medicine, National Taiwan University, Taipei 10002, Taiwan.

#### **Animal Model**

Due to the commercial unavailability of Ferucarbotran, a small-scale animal experiment was conducted. Animal experiments were carried out according to the Institutional Animal Care and Use Committee (IACUC) of NHRI (NHRI-IACUC) and performed after receiving approval from NHRI-IACUC (103118-A). Five-week-old male Balb-c nude mice were purchased from National Laboratory Animal Center of Taiwan and housed under specific pathogen-free conditions and with a 12 h light/12 h dark cycle. Mice were randomly received subcutaneous injections of 250  $\mu$ L of PBS per mouse containing  $1.0 \times 10^6$  HT-29 cells alone (Tumor alone; n = 2),  $1.0 \times 10^6$  HT-29 cells mixed with 100  $\mu$ g of unlabeled hMSCs-derived exosomes (Tumor + E100; n = 3) or ferucarbotran-labeled hMSCs-derived exosomes (Tumor + \*E100; n = 1). The tumor sizes (Figure S1) were measured by caliper two times a week from 25 days to 49 days after tumor challenges and the tumor volume was calculated according to the formula:  $0.5 \times \text{length} \times (\text{width})^2$ .

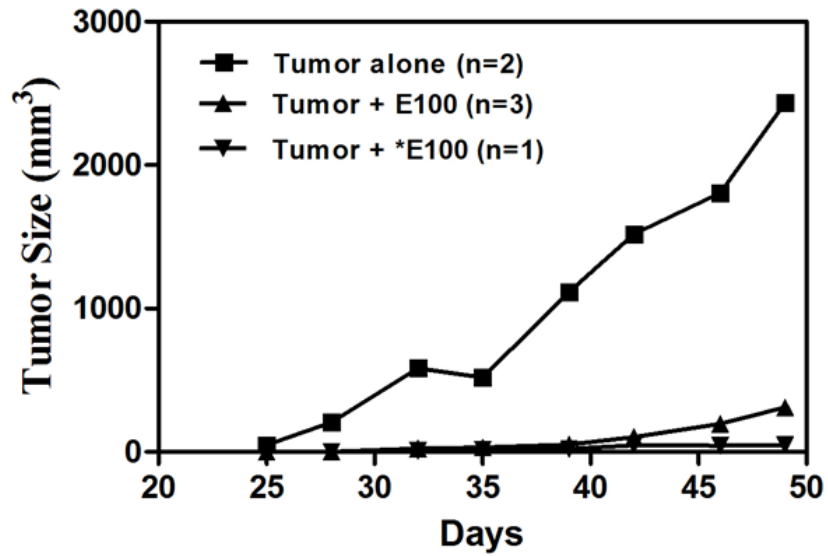

**Fig. S1** Tumor size of the HT-29 colon cells mixed with 100  $\mu$ g of unlabeled hMSCs-derived exosomes (Tumor + E100) or ferucarbotran-labeled hMSCs-derived exosomes (Tumor + \*E100) or just Tumor alone.

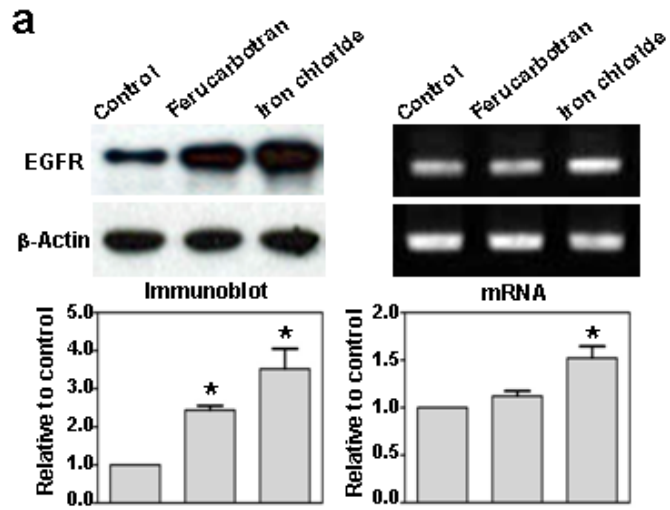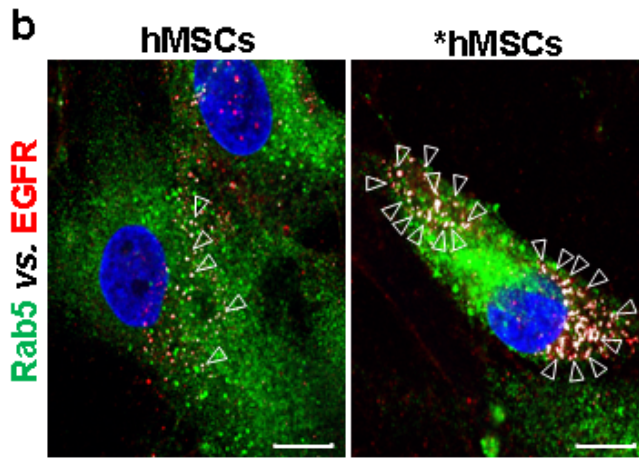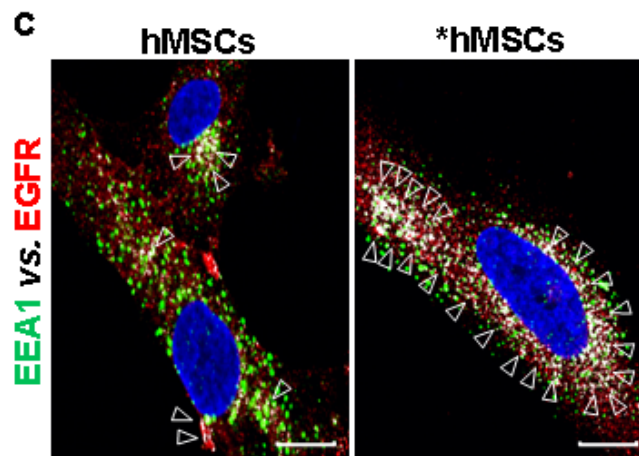

Fig. S2 A large scale image of Figure 1.

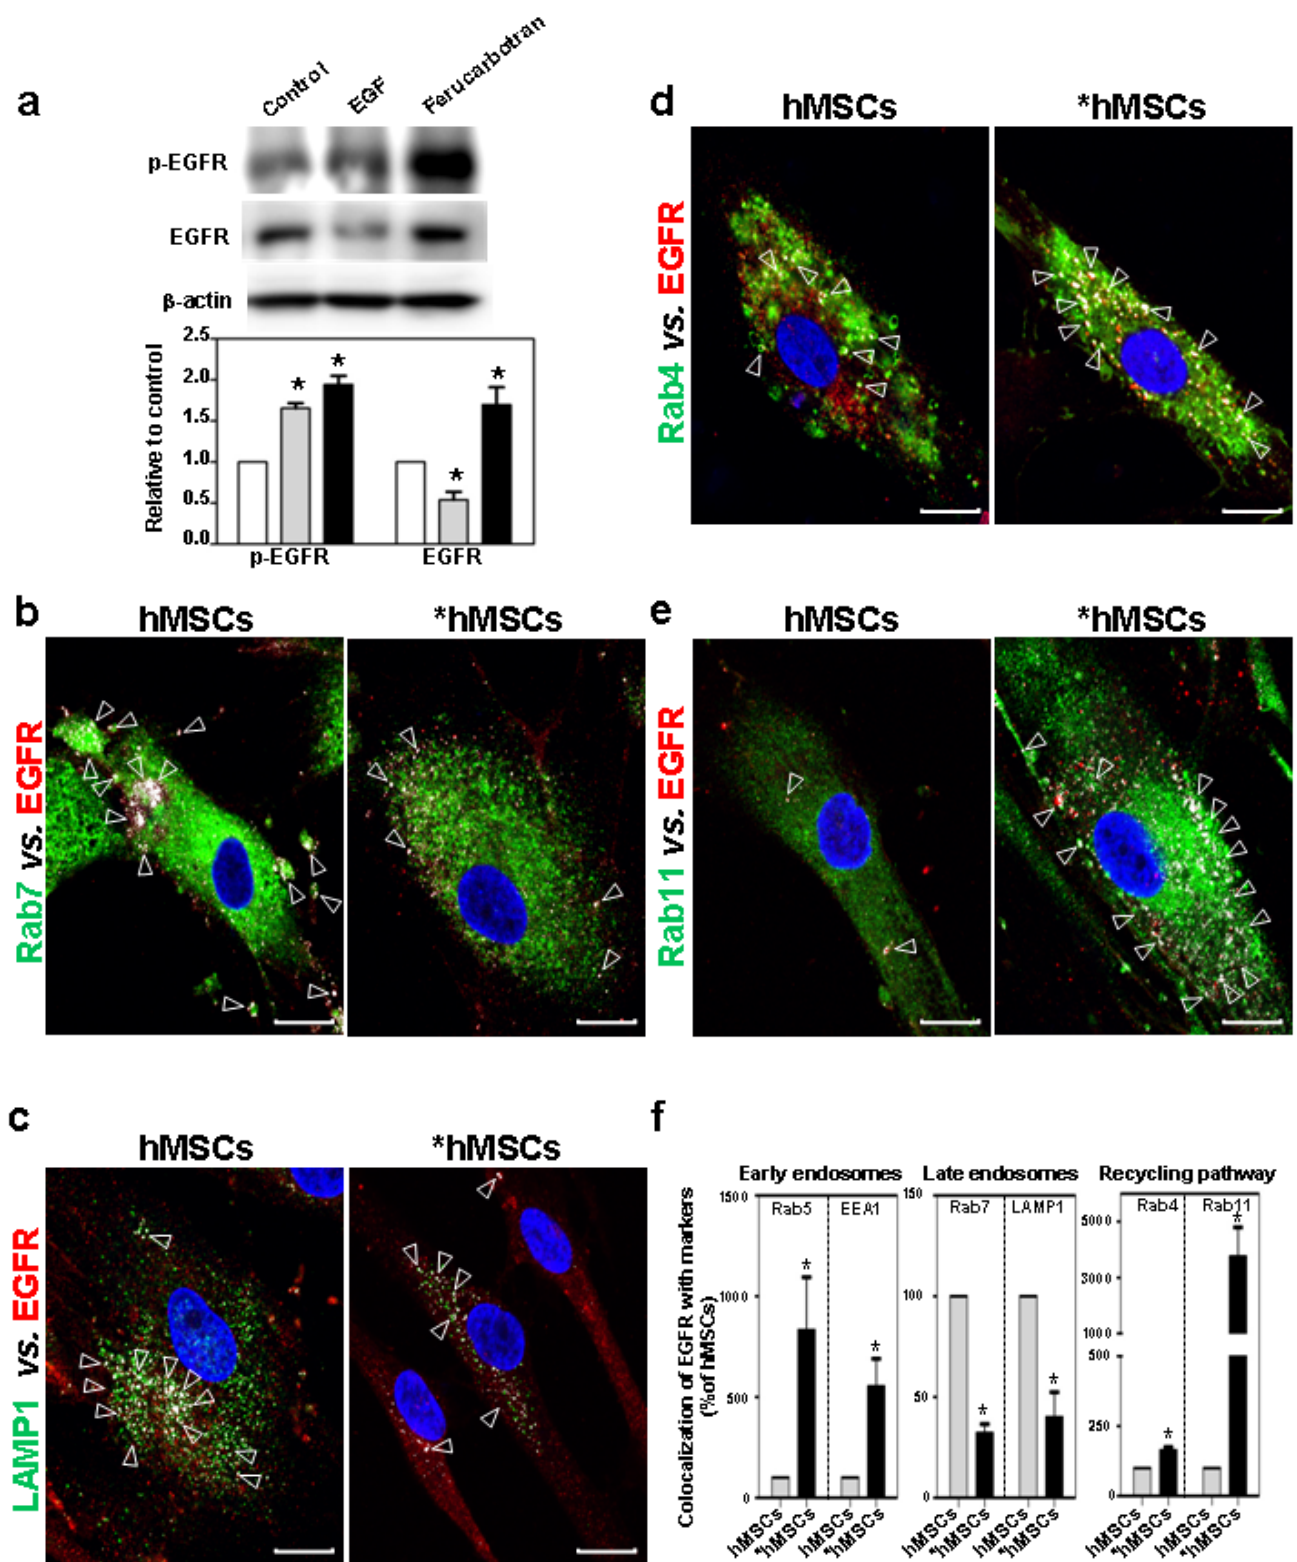

Fig. S3 A large scale image of Figure 2.
